Running head: Duckweed, microbes, and zinc contamination

# Mutualism outcome across plant populations, microbes, and environments in the duckweed *Lemna minor*

Anna M. O'Brien<sup>\*1</sup>, Jason Laurich<sup>†1</sup>, Emma Lash<sup>‡1</sup>, and Megan E Frederickson<sup>§1</sup>

<sup>1</sup>Department of Ecology and Evolutionary Biology, University of Toronto, Toronto, Ontario, M5S 3B2, Canada

We intend to make data accessible on DataDryad.

Address correspondence to Anna M O'Brien, ORCID ID: 0000-0002-8455-8620

**Keywords:** biotic interactions, freshwater ecosystems, duckweed, host-microbe interactions, phytoremediation, zinc

---

\*anna.obrien@utoronto.ca

†jason.laurich@mail.utoronto.ca

‡emma.lash@queensu.ca

§m.frederickson@utoronto.ca

## Abstract

The picture emerging from the rapidly growing literature on host-associated microbiota is that host traits and fitness often depend on complex and interactive effects of host genotype, microbial interactions, and abiotic environment. However, testing these main and interactive effects typically requires large, multi-factorial experiments and thus remains challenging in many systems. Furthermore, most studies of plant microbiomes focus on terrestrial hosts and microbes. Aquatic habitats may confer unique properties to plant microbiomes. We grew different populations of duckweed (*Lemna minor*), a floating aquatic plant of increasing popularity in freshwater phytoremediation, in three microbial treatments (adding no, “home”, or “away” microbes) at two levels of zinc, a common water contaminant in urban areas. Thus, we simultaneously manipulated plant source population, microbial community, and the abiotic environment, and measured both plant and microbial performance as well as plant traits. Although we found little evidence of interactive effects, we found strong main effects of plant source, microbial treatment, and zinc on both duckweed and microbial growth, with significant variation among both duckweed and microbial communities. Despite strong growth alignment between duckweed and microbes, zinc consistently decreased plant growth, but increased microbial growth. Furthermore, as in recent studies of terrestrial plants, microbial interactions altered a duckweed phenotype (frond aggregation). Our results suggest that the duckweed source population, its associated microbiome, and the contaminant environment may all need to be considered in real-world phytoremediation efforts. Lastly, we propose that duckweed microbes offer a robust experimental system for study of host-microbiota interactions under a range of environmental stresses.

Keywords: biotic interactions, freshwater ecosystems, duckweed, host-microbe interactions, phytoremediation, zinc

## 27 Introduction

28 Plant performance in harsh environments often depends on the associated microbial com-  
29 munity. Plant-microbe interactions commonly alter plant development and trait expression  
30 in ways that affect plant fitness, especially under stress (Friesen et al., 2011; Goh et al.,  
31 2013). Increasing complexity, interactions between environments and microbes (Smith  
32 and Read, 2008; Zhu et al., 2009; Johnson et al., 2010; Lau and Lennon, 2012; O’Brien  
33 et al., 2018), plant genotypes and microbes (Johnson et al., 2010; Wagner et al., 2014; Rúa  
34 et al., 2016), and three-way interactions among plant genotypes, microbes, and environ-  
35 ments (Johnson et al., 2010; Wagner et al., 2014) can all contribute to plant phenotypes  
36 and fitness. Indeed, local adaptation and host-microbe coevolution require genotype-by-  
37 environment (G x E) and genotype-by-genotype (G x G) interactions for plant or plant  
38 *and* microbial fitness, respectively. The geographic mosaic theory of coevolution predicts  
39 that three-way interactions (G x G x E) will be widespread (Thompson, 2005), funda-  
40 mentally shaping plant and microbial evolution. Yet in many systems, testing for G x E,  
41 G x G, and G x G x E effects is challenging because of the multi-factorial nature of the  
42 necessary study design, the high level of replication required, the relatively long generation  
43 times of plants, and the difficulties inherent in measuring microbial “fitness”.

44 Here, we aimed to develop a novel experimental system to test for interactions among  
45 plant genotype, microbial community, and environment using field-collected plants and  
46 the microbes with which they associate (and potentially coevolve) in nature. As a focal  
47 plant, we chose the tiny, aquatic angiosperm *Lemna minor* (common duckweed) because it  
48 reproduces primarily by budding, making it easy to propagate. *L. minor* occasionally flow-  
49 ers and sets seeds, and it has a higher outcrossing rate and greater genetic diversity than  
50 other duckweed species such as *Spirodela polyrrhiza* (Ho, 2017). Thus, *L. minor* collected  
51 from different locations are often different clonal genotypes, potentially hosting divergent  
52 microbial communities or adapted to different environmental conditions. Furthermore,  
53 duckweed very rapidly increase in density under both natural and experimental conditions,

54 facilitating fast experiments. *Lemna minor* is one of the world's smallest angiosperms,  
55 allowing us to grow it in merely 2.5 mL of liquid media and to load 24 experimental repli-  
56 cates on a single standard-size well plate.

57 Our current understanding of plant-microbe interactions largely comes from studies of  
58 nutritional symbioses in terrestrial plants, such as legume-rhizobium or plant-mycorrhizal  
59 associations that alleviate a nutrient stress of the plant. However, plants support a di-  
60 verse community of microbes on their roots (Bulgarelli et al., 2012; Lundberg et al., 2012;  
61 Ishizawa et al., 2017b) that can modulate effects of other plant stressors, including en-  
62 vironmental contaminants. Microbes can reduce the impacts of contaminants on plants  
63 by preventing contaminants from being taken up, by helping plants tolerate or sequester  
64 compounds, or by promoting plant growth in general and simply diluting harm done by  
65 the contaminant (Rajkumar et al., 2012). Yet, not all microbes have the same effects. For  
66 example, while some microbes bioadsorb and trap heavy metals, thus preventing them  
67 from entering plant cells (Madhaiyan et al., 2007), others produce siderophores, which  
68 often increase uptake of heavy metals by plants (Braud et al., 2009). There is great poten-  
69 tial to harness this variation in microbial effects by optimizing plant-microbe associations  
70 for bioremediation of contaminated sites (Glick, 2003; Rajkumar et al., 2012).

71 The extreme evolvability of microbial communities may explain why they underlie so  
72 much variation in plants. High species diversity, large population sizes, short generation  
73 times, and horizontal gene transfer may increase the response to selection in microbes  
74 relative to their plant hosts (Polz et al., 2013; Mueller and Sachs, 2015). For example,  
75 artificial selection on root-associated microbes resulted in 50% later flowering in *Arabidop-*  
76 *sis thaliana* (Panke-Buisse et al., 2015). Furthermore, in dual-selection on plants and soil  
77 biota for plant drought tolerance, it was microbial species turnover, and not plant adapta-  
78 tion, that accounted for most of the increase in drought tolerance (Lau and Lennon, 2012).  
79 Dual-selection on plants and microbes could involve microbe-independent responses in  
80 plants, plant-independent responses in microbes, or co-dependent responses, such as local

81 adaptation between plants and microbes for the ability to receive more benefit from local  
82 partners or favor beneficial partners (Kiers et al., 2003; Johnson et al., 2010; Lundberg  
83 et al., 2012; Simonsen and Stinchcombe, 2014; Wagner et al., 2014; Batstone et al., 2016;  
84 Rúa et al., 2016). However, when microbiomes are not perfectly transmitted from par-  
85 ent to offspring, microbial fitness is not perfectly aligned to plant fitness or selection by  
86 breeders, and individual microbes may evolve to their own benefit at the expense of hosts  
87 (Douglas and Werren, 2016). Indeed, individual microbes can be responsible for dramatic  
88 increases or decreases in plant fitness (Berg and Smalla, 2009).

89 Duckweed has been of long and continuing interest for its ability to take up a wide va-  
90 riety of contaminants from water (Mo et al., 1989; Stout et al., 2010; Stout and Nüsslein,  
91 2010; Sekomo et al., 2012; Gatidou et al., 2017). Duckweed have potential for bioreme-  
92 diation of many contaminants, including low-level zinc contamination (Dirilgen and Inel,  
93 1994; Radić et al., 2010; Jayasri and Suthindhiran, 2017), a common problem of urban and  
94 suburban water bodies (Göbel et al., 2007), including around Ontario (Miller et al., 1992;  
95 Glooschenko et al., 1992; Liskco and Struger, 1996; Ontario Ministry of the Environment,  
96 2011), likely having moderate detrimental effects on animal life (Glooschenko et al., 1992;  
97 Miller et al., 1992; Heijerick et al., 2002). Duckweed lines are known to vary in sensitivity  
98 to zinc concentrations (Van Steveninck et al., 1990), though tolerance may depend also on  
99 the presence of other heavy metals (Dirilgen and Inel, 1994; Balen et al., 2011). Duckweed  
100 growth rate is the primary factor influencing contaminant removal (Zhao et al., 2014a),  
101 and this varies across duckweed genotypes and nutrient levels (Sree et al., 2015; Ziegler  
102 et al., 2015).

103 It is unclear how much of our understanding of plant-microbe interactions in terres-  
104 trial environments translates to floating aquatic habitats. For example, unlike the rhi-  
105 zosphere microbiomes of terrestrial plants, the diversity of species growing with *Lemna*  
106 *minor* is likely much lower (Ishizawa et al., 2017b). However, there is already some sugges-  
107 tive evidence for GxGxE effects in duckweed-microbiome-contaminant systems, in that mi-

108 microbial communities affect duckweed growth rates and contaminant removal (Zhao et al.,  
109 2014*b*, 2015; Ishizawa et al., 2017*b*). Here, we explored the interactive effects of microbial  
110 communities, zinc contamination, and host genotype on duckweed fitness and phenotypes,  
111 as well as on microbial growth. We hypothesized that as in terrestrial plants, fitness and  
112 phenotypes would be shaped by the interactive effects of biotic and abiotic environments.

## 113 **Methods**

114 To investigate the interactive effects of microbial communities and contaminants on duck-  
115 weed growth and phenotypes, we tested four populations of duckweed with three microbial  
116 treatments in two zinc environments. We collected duckweed from ponds in the Greater  
117 Toronto Area in the summer of 2017 (Table 1). We first extracted microbes by pulver-  
118 izing fresh tissue from each site of 1 or 2 fronds, plating the slurry onto yeast mannitol  
119 media agar plates, culturing at 29°C for 5 days, and placing at 4°C for storage. These  
120 microbes comprise the subset of the duckweed microbiome that can live on yeast mannitol  
121 media. We transferred field-collected live duckweed to growth media (Krazčič et al., 1995)  
122 and maintained stock populations of each duckweed line in 500 mL glass jars in a growth  
123 chamber with a cycle of 23°C and 150  $\mu\text{mol}/\text{m}^2$  lighting for 16 hours followed by 18°C and  
124 dark for 8 hours.

125 Our three microbial treatments were: none, added “home” microbes, and added “away”  
126 microbes from one of the other three populations. Which “away” microbes a duckweed  
127 population received was selected randomly without replacement. The randomization paired  
128 plants from Kelso with microbes from Moccasin, plants from McCraney with microbes  
129 from Kelso, plants from Moccasin with microbes from Stoney Creek, and plants from Stoney  
130 Creek with microbes from McCraney. We made a separate microbial inocula from each  
131 site by taking a swab across the stored agar plate, adding to liquid yeast mannitol media,  
132 culturing in a shaker for five days at 30 °C and 200 rpm, and then diluting to control op-  
133 tical density across inocula. Because communities are made of various species, the transla-

| Site         | Latitude | Longitude |
|--------------|----------|-----------|
| Kelso        | 43.51    | -79.95    |
| McCraney     | 43.44    | -79.74    |
| Moccasin     | 43.73    | -79.33    |
| Stoney Creek | 44.28    | -78.70    |

Table 1: Locations of source sites for duckweed and associated microbes.

134 tion of optical density to cell count is inexact (see below), but inocula were approximately  
135 200 cells per  $\mu\text{L}$ .

136 We placed each experimental plant into 2.5 mL autoclaved growth media (Krazčič  
137 et al., 1995) in a 3.4 mL well of a 24-well plate. Before adding each plant, we removed  
138 surface microbes from the lab culture by dipping in 75% ethanol. Plants selected were  
139 approximately the same size, and all had one mature and one immature frond each. After  
140 adding plants to wells, 20  $\mu\text{L}$  of the treatment-specific microbial inoculum was added to  
141 each well.

142 We crossed the 12 combinations of duckweed genotype and microbial community with  
143 low (0.86 micromolar) or high (3.44 micromolar) zinc water concentrations; four times the  
144 amount of  $\text{ZnSO}_4$  was added to the high compared to the low zinc treatment solution (a  
145 negligible increase of sulfate concentration). These concentrations of zinc represent natural  
146 (Liskco and Struger, 1996) and elevated levels, such as those generated by waste discharge  
147 (Ontario Ministry of the Environment, 2011) runoff events (Liskco and Struger, 1996;  
148 Göbel et al., 2007). We repeated the full design over 10 replicates per treatment combi-  
149 nation for a total of 240 plants in 10 24-well plates. Replicates were assigned to wells at  
150 random, and as a result treatments were spatially interspersed within plates.

151 We photographed plates under a stationary camera at the beginning and end of the  
152 experiment. After taking the beginning photograph, each plate was sealed with a gas-  
153 permeable membrane to prevent contamination among wells, and placed into a growth  
154 chamber set to the same conditions as above (23°C and 150  $\mu\text{mol}/\text{m}^2$  lighting for 16 hours,  
155 18°C and dark for 8 hours). After 10 days, we removed plates and photographed again to

156 measure change in growth and phenotypes. From the photographs, we hand counted the  
157 number of final fronds in each well, and used ImageJ (Schneider et al., 2012) to measure  
158 the total pixel area of duckweed from start to finish (growth rate), greenness of fronds  
159 (relative to blue and red), and the ratio of the total pixel area of the fronds in a well to  
160 the total perimeter of fronds in a well as a measure of the tendency of fronds to aggregate.  
161 More aggregated fronds may be more stable and dense on the water surface, which could  
162 increase shading of the water and reduce warming. Much local duckweed habitat in the  
163 sampling area is stormwater ponds, and reducing temperatures of the outflow water to  
164 streams is of concern for fish (e.g. Chu et al., 2005; Herb et al., 2009; Comte et al., 2013).  
165 Greenness should be a coarse indication of chlorophyll content (Adamsen et al., 1999;  
166 Keenan et al., 2014), indicating potential, rather than realized, growth.

167 As a measure of microbial growth, we measured the optical density of suspended well  
168 solution, using starting growth media in the well as a blank control. Plates were frozen  
169 and stored at  $-20^{\circ}\text{C}$  before optical density measures, so that microbial growth did not  
170 continue as measurements were taken. For a subsample of replicates (3 out of 10), we  
171 also measured microbial growth with an alternate method. Immediately after the end of  
172 the experiment (before freezing), we sampled  $10\ \mu\text{L}$  of well solution, diluted to 1 mL and  
173 then plated  $10\ \mu\text{L}$  of the dilution onto agar petri dishes and grew at  $29^{\circ}\text{C}$  for 5 days. We  
174 then scored the number of colony forming units (CFUs) on plates, as a measure of the  
175 total microbial growth. Some plates had colonies too numerous to accurately count, so we  
176 excluded those measurements (4 total) from analysis.

177 We analyzed data in R (R Core Team, 2014). We first quantified the effect of inoc-  
178 ulation with microbes on duckweed growth and microbial optical density to verify that  
179 manipulation of microbes was successful and that it positively affects duckweed. We used  
180 linear models in MCMCglmm (Hadfield, 2010) with change in duckweed pixel area, final  
181 frond number (all wells started with 2 fronds), and optical density in wells as the separate  
182 response variables (10,000 iterations, 1,000 burn in, thinning by 50). We subset to data for



183 inoculated treatments for the remaining analyses.

184 For each response variable, we searched for the best model out of all possible models  
185 including the potential explanatory variables of duckweed population, microbe population,  
186 combination of duckweed and microbes categorized as “home” or “away”, zinc treatment,  
187 and all possible two-way interactions using the dredge (package MuMIn Bartoń, 2013)  
188 and MCMCglmm functions (10,000 iterations, 1,000 burn in, thinning by 50), limited to  
189 a maximum of 4 parameters in addition to the intercept. Best models were determined  
190 by comparing DIC (Spiegelhalter et al., 2002). We re-fit the top three models for each  
191 response variable with increased MCMC parameters (100,000 iterations, 10,000 burn in,  
192 thinning by 500) to verify the best model. If the top 3 models were indistinguishable in  
193 DIC (swapped order in DIC fit across repeated MCMC chains), we selected the simplest.  
194 Frond number was treated as poisson distributed, all other variables were treated as gaus-  
195 sian. We report results for the best model for each response variable. We determined sig-  
196 nificant differences between treatments using 95% highest posterior density intervals as  
197 calculated from the posterior distribution of parameter effects.

198 Finally, we asked whether associations exist between duckweed growth measures (plant  
199 fitness), traits, and optical density (total microbial growth, putatively linked to average  
200 microbial fitness across species) using treatment means. Strong associations would suggest  
201 that duckweed fitness is linked to duckweed traits or total microbial abundance. We also  
202 verified a relationship between optical density and colony forming units (i.e. live cells) in  
203 the subset of wells with both measurements. While both attempt to measure microbial  
204 growth during the experiment, colony forming units suffers from post-experiment compet-  
205 itive dynamics on petri plates, overgrowth obscuring some individual colonies, and being  
206 laborious data to collect. Optical density is not affected by post-experiment dynamics nor  
207 human counting error, but is unlikely to be equal across all microbe species, and may be  
208 influenced by dead cells. We measured each association by again fitting linear models with  
209 MCMCglmm() using duckweed growth, traits, and optical density as paired response and

210 explanatory variables, and using optical density and CFUs (100,000 iterations, 10,000 burn  
211 in, thinning by 500).

## 212 **Results**

213 We aimed to understand GxGxE effects on duckweed traits and fitness across duckweed  
214 genotype, microbial communities and contaminant environments. Using a growth cham-  
215 ber experiment, we manipulated all three sources of variation, and quantified the effects  
216 of distinct microbial communities and zinc levels across different duckweed populations.  
217 We found first that adding microbes had a significant positive effect on average growth  
218 measured in either pixels or frond number (both pMCMC < 0.001) relative to sterilized  
219 duckweed alone, suggesting that the microbial communities as a whole, or some subset of  
220 the species, provide benefits to duckweed in the laboratory environment (Figure 1, across  
221 all other treatments combined). We also found that while our sterilization procedure for  
222 duckweed fronds was imperfect, there were many fewer microbes detected in the wells  
223 where microbes had not been re-inoculated onto duckweed (pMCMC < 0.001, Figure 1).

224 We next explored variation in duckweed fitness across experimental treatments. Our  
225 best model for growth in pixel area included both variable effects of duckweed source pop-  
226 ulation (pMCMC < 0.01), microbe source population (pMCMC < 0.01) and consistently  
227 negative effects of increasing zinc level (pMCMC < 0.001). Comparing 95% highest pos-  
228 terior density intervals (HPDI), duckweed plants from Moccasin and Stoney Creek grew  
229 larger than plants from Kelso and McCraney, and plants from McCraney grew less than  
230 those from Kelso. Additionally, duckweed plants growing with Moccasin microbes grew  
231 more than plants with other microbes, and duckweed with Kelso microbes grew less (95%  
232 HPDI, Figure 2, top panel). While the best model did not include interactive effects be-  
233 tween any of these terms on growth in pixel area in the best model (i.e. there were no  
234 GxG, GxE, or GxGxE effects), we note that duckweed and microbe main effects are dif-  
235 ficult to distinguish from duckweed and microbe interactive effects in this experimental

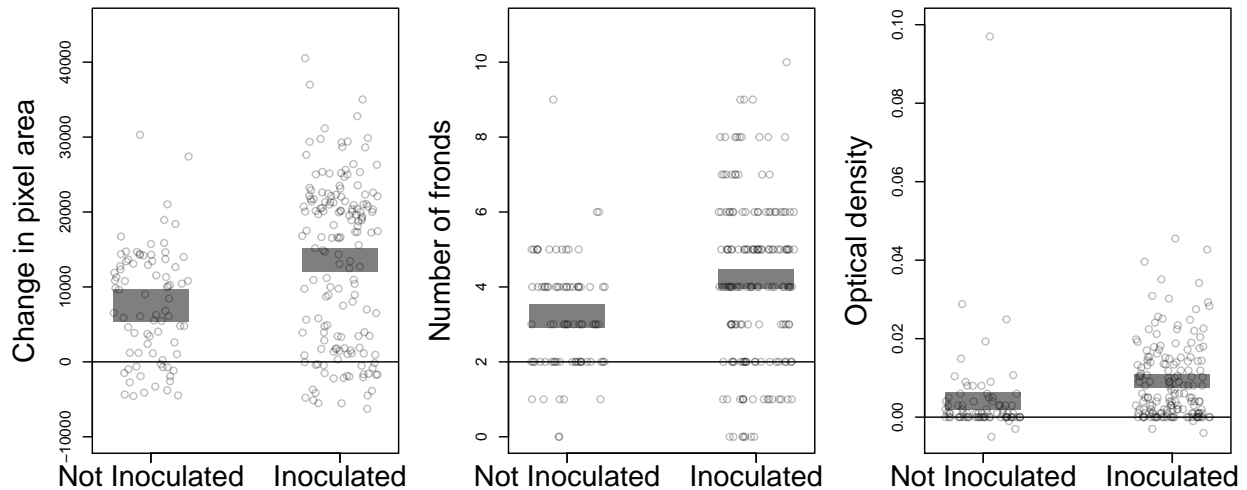

Figure 1: Inoculation with microbes increased duckweed fitness and total microbial growth, compared to surface-sterilized plants that did not receive additional microbes. From left to right, plots show change in pixel area, final duckweed frond number (horizontal line at 2, indicates starting frond number), and optical density of suspended microbes comparing inoculated and uninoculated treatments. Open points are individual wells. Grey regions are 95% highest posterior density intervals for the mean.

236 design. The best model for frond number (Figure 2, middle panel) included only effects of  
237 duckweed source population (pMCMC < 0.01) and microbe source population (pMCMC  
238 < 0.01), with nearly identical plant and microbe treatment effects as in the pixel area  
239 model, except that plants in Moccasin microbes grew the same number of fronds as plants  
240 in microbes from Stoney Creek and McCraney. Biotic context (microbial community),  
241 environment (zinc), and plant genotype (source) thus independently influence at least one  
242 aspect of duckweed fitness.

243 Total microbial growth, inferred from optical density, also varied across experimental  
244 treatments. The best model for optical density included effects of microbe source (pM-  
245 CMC < 0.01), plant source (pMCMC < 0.01), and zinc treatment (pMCMC < 0.05). Wells  
246 inoculated with microbes from Moccasin had the highest microbial growth, and plants  
247 from Stoney Creek and Moccasin supported greater increases in optical density, as did  
248 treatment with high zinc (all at 95% HPDI, Figure 2). These results suggest that micro-  
249 bial growth is altered by variation among plant inputs, microbial community composition,

250 and zinc runoff levels, but not altered by interactions among these biotic and abiotic in-  
251 fluences. We also explored the relationship between optical density and colony forming  
252 units (i.e. viable cells) in the subset of wells for which we have both measures. The two  
253 measures are moderately correlated with marginal significance ( $\rho = 0.28$ ,  $p\text{MCMC} < 0.1$ ,  
254 Figure S1).

255 To assess whether treatments have concerted or separate effects on microbial growth  
256 and plant fitness, we fit models of treatment mean fitness or growth for plants and mi-  
257 crobes. Duckweed fitness was significantly related to microbial growth (effectively, fitness  
258 averaged across all species in optical density measures) for both pixel area ( $p\text{MCMC} <$   
259  $0.01$ ) and frond number ( $p\text{MCMC} < 0.001$ , Figure 3). This suggests strong fitness align-  
260 ment, with microbes that provide duckweed with fewer fitness benefits also having lower  
261 fitness, and vice versa. This occurs despite positive responses to zinc among microbes,  
262 but negative responses in duckweed (see above, Figure 2). However, fitness alignment  
263 should be interpreted with caution because abundance was not measured separately for  
264 each microbe species.

265 The factors best explaining variation in phenotypes differed between plant pheno-  
266 types. For greenness of floating tissue, plant population was the only explanatory variable  
267 included in the best model ( $p\text{MCMC} < 0.01$ ), and plants from Moccasin and Stoney Creek  
268 were greener than others (95% HPDI, Figure 4). In contrast, the best model for frond ag-  
269 gregation (pixel area divided by the perimeter of all particles) included microbe ( $p\text{MCMC}$   
270  $< 0.01$ ) and plant source effects ( $p\text{MCMC} < 0.01$ ), as well as negative effects of increased  
271 zinc ( $p\text{MCMC} < 0.05$ ). Duckweed from McCraney were significantly less aggregated than  
272 other duckweed, while duckweed from Moccasin and Stoney Creek were more aggregated,  
273 and microbes from Kelso supported less aggregated duckweed plants (95% HPDI, Figure  
274 4). In sum, we see that plant genotype (source), biotic interactions (microbial community),  
275 and aquatic toxins (zinc level) affect phenotype expression unequally across phenotypes.

276 Finally, we observed some co-correlations among response variables. Growth in pixel

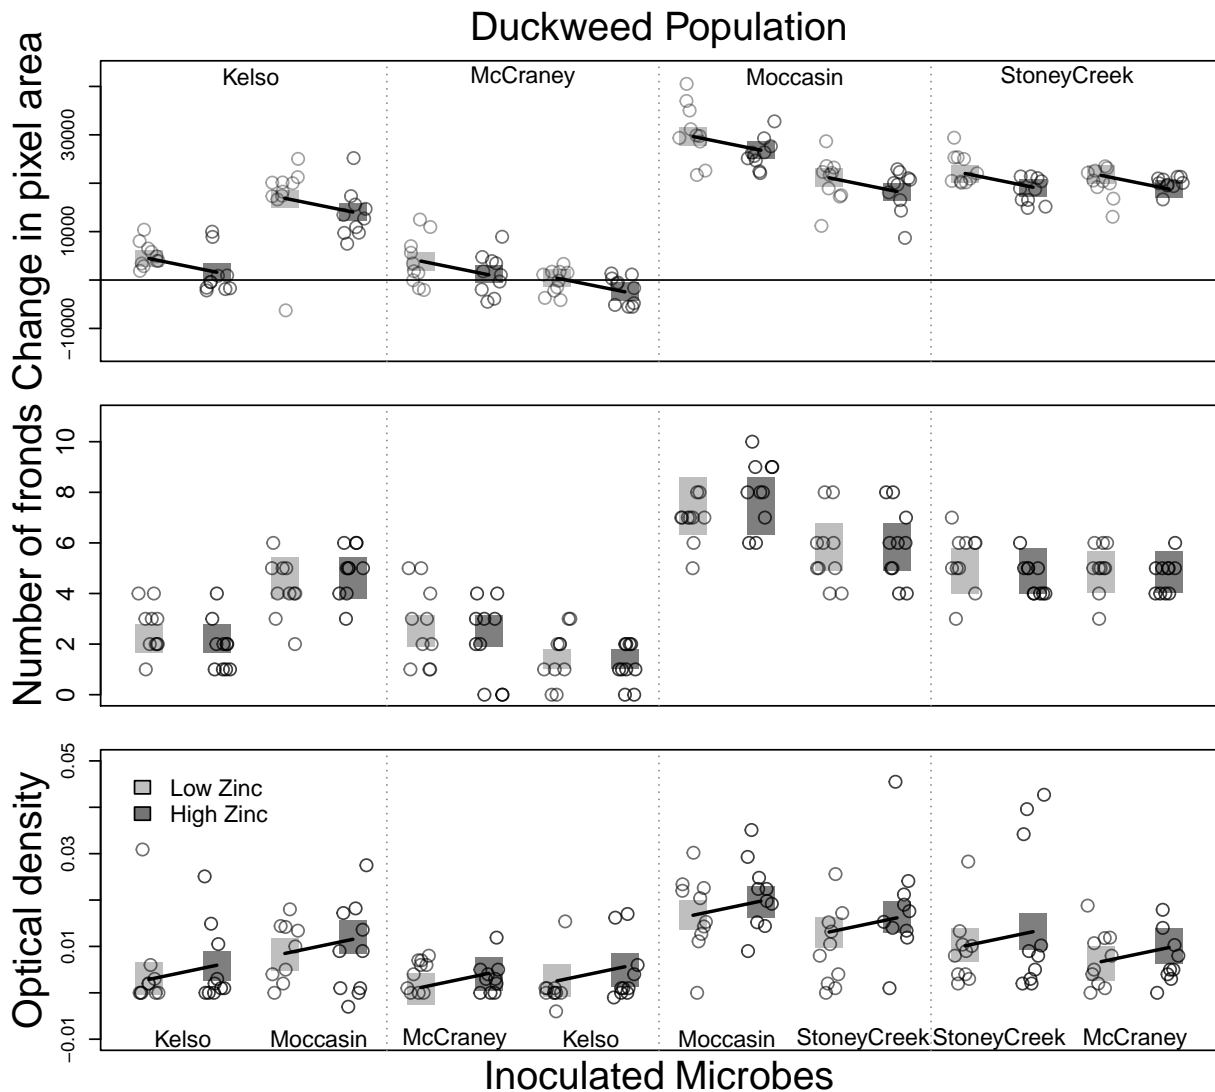

Figure 2: Duckweed fitness and total microbial growth (optical density). Change in pixel area (top panel) and frond number (middle panel) of duckweed plants. Bottom panel shows optical density relative to blank media from samples of each experimental well at the end of the experiment. Points are individual wells. Grey regions are best model 95% highest posterior density intervals for treatment means. Different populations of duckweed are separated by vertical dashed lines and labeled at the top, while microbe treatments are labeled at the bottom. High zinc levels are indicated with darker gray. Plant population and microbe effects are significant in all panels, whereas zinc effects (indicated by solid black lines), are significant for pixel area change and optical density only.

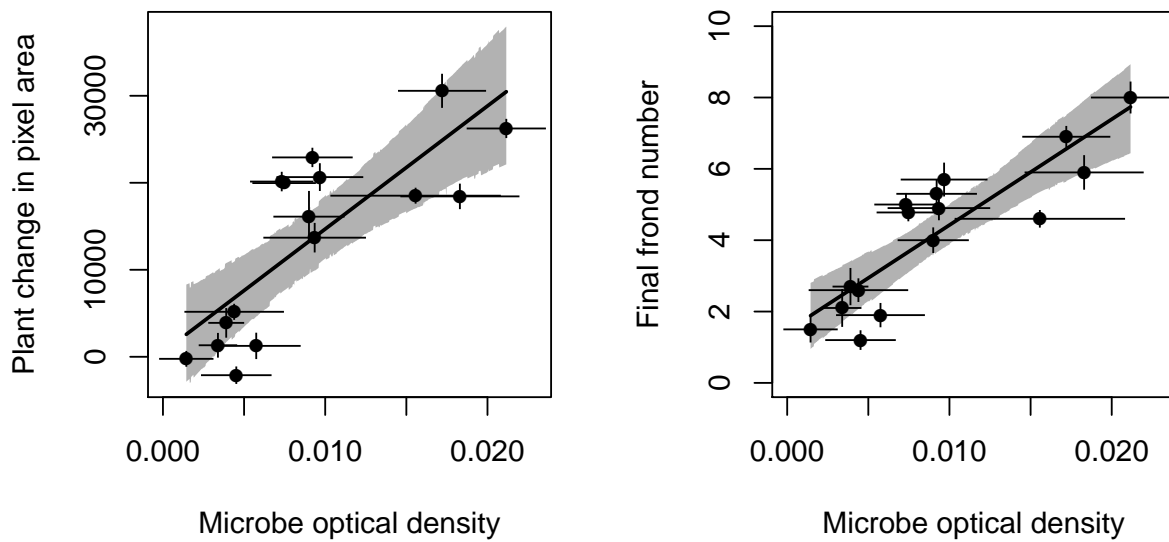

Figure 3: Fitness alignment between duckweed and microbes across experimental treatments, where duckweed fitness is measured either as increase in pixel area or final frond number and microbe “fitness” is optical density measured across all species in the community. Points are means for each experimental treatment, and whiskers are standard errors. The linear relationships in the background are the model predictions for the means (solid line) with 95% highest posterior density intervals in gray.

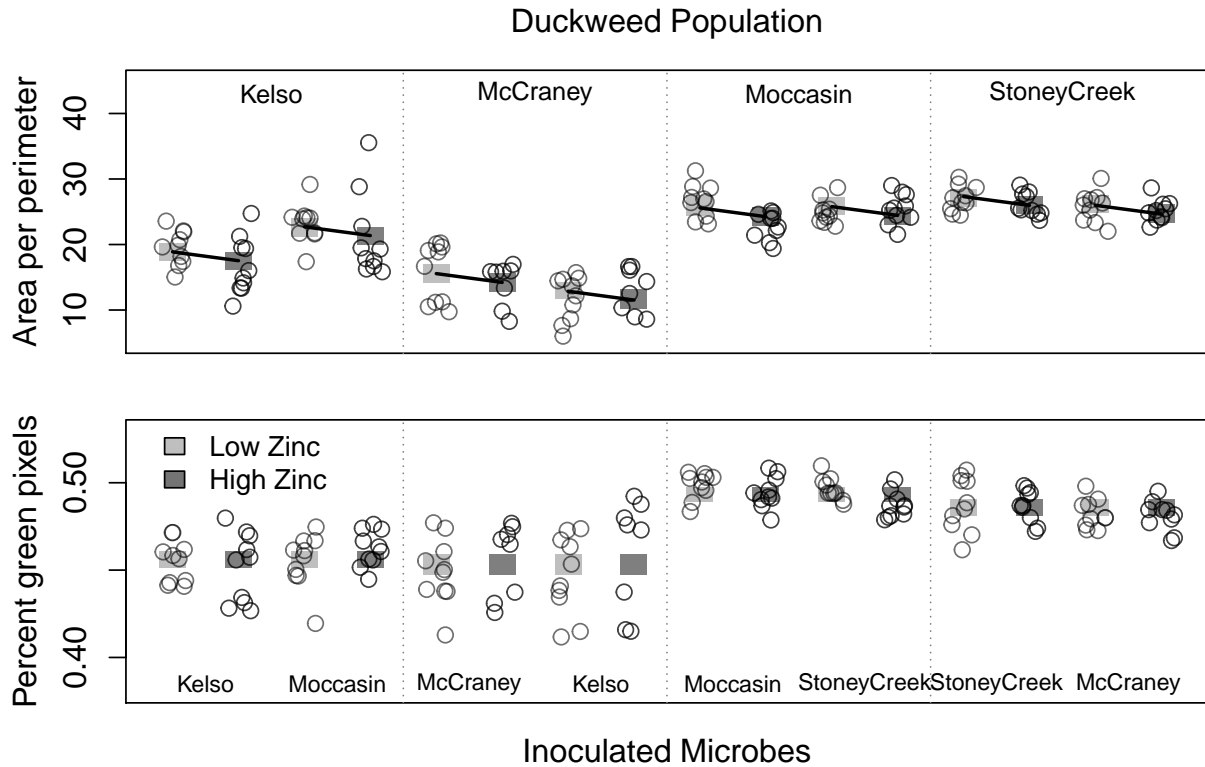

Figure 4: Duckweed traits. Frond aggregation (top, ratio of total pixels to total perimeter) and greenness (bottom, percent of pixel area that is green) in duckweed plants at the end of the experiment. Points are individual wells. Vertical blocks behind points are best model predicted 95% highest posterior density intervals for the means of each treatment combination. Different populations of duckweed are separated by vertical dashed lines and labeled at the top, while microbe treatments are labeled at the bottom. High zinc levels are indicated with darker gray. Plant population explains significant variation for both traits, whereas aggregation is additionally explained by microbe and zinc level (model zinc effect depicted by solid black lines).

277 area is correlated with frond number ( $\rho = 0.88$ ), frond aggregation score ( $\rho = 0.84$ ) and  
278 greenness ( $\rho = 0.69$ ). Likewise, greenness is correlated with frond number ( $\rho = 0.72$ ) and  
279 aggregation score ( $\rho = 0.70$ ), and aggregation score is also correlated to frond number  
280 ( $\rho = 0.70$ ). Microbial abundance (optical density) is also correlated with greenness ( $\rho =$   
281  $0.40$ ), and aggregation score ( $\rho = 0.36$ ), indicating a link between duckweed phenotypes,  
282 duckweed fitness, and microbe growth (all slopes significant at  $p_{\text{MCMC}} < 0.01$ ).

## 283 Discussion

284 Microbial communities living near, on, and inside host tissues constitute a ubiquitous as-  
285 pect of the biotic environments of plants. Just like abiotic conditions, microbial biotic  
286 conditions can affect the expression of phenotypically plastic traits and fitness in terres-  
287 trial plants (Friesen et al., 2011; Wagner et al., 2014). We explored how abiotic and biotic  
288 factors may together or separately influence trait development and fitness in duckweed  
289 and its associated microbes. We found strong differences in phenotypes and fitness across  
290 duckweed driven by duckweed origin, the origin of co-cultured microbial communities, and  
291 treatment with the aquatic contaminant zinc, but no co-dependent effects.

292 Interestingly, while the effect of duckweed source population affected all phenotypes  
293 and fitness measures, and microbe source affected most measures, only for pixel area, op-  
294 tical density, and aggregation did we observe effects of abiotic environments (Figures 2,4).  
295 The contrasts among patterns for phenotypes and fitness of duckweed is somewhat sur-  
296 prising, since growth in area and number of individuals should both be measures of growth  
297 rate, and since both measured phenotypes are presumably linked to fitness (all have signif-  
298 icant pairwise correlations). Greenness should be primarily related to chlorophyll content  
299 and future reproductive potential, and aggregation is likely the inverse of vulnerability  
300 to air and water current dispersion. It could be that the lab environment prevents fitness  
301 effects of variation in these phenotypes, or that other, unmeasured, phenotypes dominate  
302 effects on fitness. Alternatively, we may have limited power to quantify abiotic and inter-



303 active effects on fitness due to dramatic main effects of duckweed and microbial sources,  
304 incomplete culture of the field microbiome under lab conditions, or incomplete sterility be-  
305 fore microbial inoculation, although strong effects of microbial inoculation (Figures 1,2,4)  
306 suggests minimal influence of incomplete sterility.

307 Genetic diversity among duckweed populations is a possible source for the significant  
308 variation across duckweed population sources. However, existing work suggests fairly low  
309 genetic diversity in *L. minor* in the local region (Ho, 2017). Duckweed phenotypic diver-  
310 sity could also come from variation in endosymbiotic microbes, which would not have been  
311 removed by our surface sterilization, or from epigenetic differences across populations.  
312 Such genetic, epigenetic, or endosymbiotic diversity might be generated by neutral diver-  
313 gence among populations, or by trade-offs for phenotypes across environments (e.g. Prati  
314 and Schmid, 2000; Agrawal et al., 2010; Albert et al., 2010), both commonly observed  
315 phenomena.

316 The substantial phenotypic and growth differences among microbial treatments that  
317 we observed are likely in large part due to differing microbial species composition, because  
318 the effects of microbial communities on plants are often highly contingent on community  
319 composition (Berg and Smalla, 2009). Interestingly, community composition itself can  
320 be a function of plant influences (e.g. microbially driven plant-soil feedback Klironomos,  
321 2002; Anacker et al., 2014). The underlying question for the effects we observed here is  
322 thus why microbial communities may differ across sites. Environmental filtering of species,  
323 random colonization differences across space, and the duckweed plants themselves (e.g.  
324 plant-water feedbacks) could be involved in generating these different communities. Analo-  
325 gous to microbially driven plant-soil feedbacks observed in terrestrial plants (Bailey and  
326 Schweitzer eds., 2016), such plant-water feedbacks could be common. Consistent with  
327 potential for plant-water feedbacks, duckweed sources seem to drive the overall increases  
328 in microbial abundance (Figure 2), however, it remains unknown whether duckweed plants  
329 influence microbial community composition.

330 The microbial communities investigated here can best be described as beneficial (Fig-  
331 ure 1) from the perspective of the duckweed. In plant-microbe mutualisms, we generally  
332 see positive correlations between host and symbiont fitness (Friesen, 2012), although some  
333 environments may decouple them (Weese et al., 2015; Shantz et al., 2016). Aquatic mi-  
334 crobes associated with duckweed species that may affect growth are known to include  
335 diatoms (Desianti, 2012), nitrogen-fixing cyanobacteria (Zuberer, 1982; Duong and Tiedje,  
336 1985; Eckardt and Biesboer, 1988), and a collection of additional bacteria, including mem-  
337 bers of other nitrogen-fixing clades (Underwood and Baker, 1991; Ishizawa et al., 2017*b*),  
338 and one that may provision phosphorus (Ishizawa et al., 2017*a*). Here we find positive  
339 correlations between duckweed fitness and microbial growth across treatments (Figure 3),  
340 potentially indicating positive fitness feedbacks (Sachs et al., 2004) between duckweed and  
341 the community of microbes that live on them. This positive fitness association is despite  
342 average decreases in duckweed fitness, and average increases microbial growth, in response  
343 to increased zinc, and suggests that zinc in runoff water will not cause mutualism break-  
344 down between duckweed and microbes.

345 The differences across duckweed populations and microbial communities we see here  
346 may alter the potential of duckweed to remediate environments contaminated with zinc or  
347 other pollutants. Others have postulated that duckweed may be of interesting and unique  
348 value in phytoremediation of water (Mkandawire and Dudel, 2007; Ziegler et al., 2016),  
349 specifically due to its uptake or modification of a wide variety of aquatic pollutants (Mo  
350 et al., 1989; Stout and Nüsslein, 2010; Stout et al., 2010; Sekomo et al., 2012; Uysal, 2013;  
351 Sasmaz et al., 2015; Baciak et al., 2016; Gatidou et al., 2017; Gomes et al., 2017). Plant-  
352 associated microbes are often in part responsible for removal or detoxification of contami-  
353 nants, and presence of various taxa on duckweed may alter its phytoremediation potential  
354 (Toyama et al., 2009; Zhao et al., 2015). Microbes may alter phytoremediation through  
355 impacts on plant growth rate (Glick, 2003; Sobariu et al., 2017), by altering the relative  
356 rates at which non-toxic nutrients and toxic pollutants are taken up (Burd et al., 2000),

357 or by directly metabolizing or altering pollutants, as has been discovered in a microbe in-  
358 habiting the roots of another duckweed species (Toyama et al., 2009). Here, we focused on  
359 zinc contamination. Zinc was previously found to both be sequestered by duckweed, and  
360 to physiologically affect duckweed (Radić et al., 2010; Jayasri and Suthindhiran, 2017).  
361 We found that microbes from different natural duckweed sites alter duckweed growth rates,  
362 respond positively to zinc, and generally increase duckweed fitness (Figures 1,2, and 3).  
363 Thus microbes likely indirectly influence the ongoing and potential amount of phytoreme-  
364 diation in duckweed-inhabited sites. However, how microbiomes affect the fate of zinc or  
365 other contaminants, and whether microbiome species composition plays a predictable role  
366 remain open questions.

## 367 **Conclusions**

368 Here, we found that microbiome variation has complex effects on phenotypes and fitness in  
369 an aquatic plant, similar to how microbiome variation affects terrestrial plants. This is de-  
370 spite the fact that duckweed draws a microbiome from the water environment that is less  
371 complex than typical terrestrial plant microbiomes (Lundberg et al., 2012; Ishizawa et al.,  
372 2017*b*). As a smaller plant with a simpler microbiome, more manipulative experimentation  
373 is possible for duckweed microbiomes than for terrestrial plant microbiomes. We expect  
374 that duckweed and its associated microbiome will thus prove pivotal in experimentally  
375 elucidating properties of ecology and evolution in plant-microbiome interactions, and in  
376 manipulating these effects for applied approaches, such as phytoremediation.

## 377 **Acknowledgements**

378 This work was funded by the Natural Sciences and Engineering Council of Canada (NSERC),  
379 through a Discovery Grant to MEF (RGPIN-2015-06742) and a Canada Graduate Scholar-  
380 ship to JL. EL was supported by the University of Toronto Centre for Global Change Sci-  
381 ence. The authors would like to thank D. Sinton and B. Nguyen for engineering solutions

382 improving our experimental set-up and members of the Frederickson lab for discussion.  
383 JL, EL, and MEF executed collections. AMO and JL ran the experiment and collected  
384 data. AMO performed analyses and provided the first draft. All contributed to study  
385 design, revised the manuscript, and gave approval for publication.

## References

- 386  
387 Adamsen, F., P. J. Pinter, E. M. Barnes, R. L. LaMorte, G. W. Wall, S. W. Leavitt, and  
388 B. A. Kimball. 1999. Measuring wheat senescence with a digital camera. *Crop Science*,  
389 **39**:719–724.
- 390 Agrawal, A. A., J. K. Conner, and S. Rasmann. 2010. Tradeoffs and negative correlations  
391 in evolutionary ecology. *Evolution since Darwin: the first*, **150**:243–268.
- 392 Albert, C. H., W. Thuiller, N. G. Yoccoz, R. Douzet, S. Aubert, and S. Lavorel. 2010.  
393 A multi-trait approach reveals the structure and the relative importance of intra-vs.  
394 interspecific variability in plant traits. *Functional Ecology*, **24**:1192–1201.
- 395 Anacker, B. L., J. N. Klironomos, H. Maherali, K. O. Reinhart, and S. Y. Strauss. 2014.  
396 Phylogenetic conservatism in plant-soil feedback and its implications for plant abun-  
397 dance. *Ecology Letters*, **17**:1613–1621.
- 398 Baciak, M., Ł. Sikorski, A. I. Piotrowicz-Cieślak, and B. Adomas. 2016. Content of  
399 biogenic amines in *lemna minor* (common duckweed) growing in medium contaminated  
400 with tetracycline. *Aquatic Toxicology*, **180**:95–102.
- 401 Bailey, J. and J. Schweitzer eds. 2016. *Functional Ecology Special Feature: Ecosystems,*  
402 *evolution, and plant-soil feedbacks*. **30**:1025–1266.
- 403 Balen, B., M. Tkalec, S. Šikić, S. Tolić, P. Cyjetko, M. Pavlica, and Ž. Vidaković-Cifrek.  
404 2011. Biochemical responses of *lemna minor* experimentally exposed to cadmium and  
405 zinc. *Ecotoxicology*, **20**:815–826.
- 406 Bartoń, K. 2013. MuMIn: multi-model inference, R package version 1.9.13. CRAN  
407 <http://CRAN.R-project.org/package=MuMIn>.
- 408 Batstone, R., E. Dutton, D. Wang, M. Yang, and M. Frederickson. 2016. The evolution of  
409 symbiont preference traits in the model legume *medicago truncatula*. *New Phytologist*,  
410 **in press**.
- 411 Berg, G. and K. Smalla. 2009. Plant species and soil type cooperatively shape the struc-  
412 ture and function of microbial communities in the rhizosphere. *FEMS Microbiology*  
413 *Ecology*, **68**:1–13.
- 414 Braud, A., K. Jézéquel, S. Bazot, and T. Lebeau. 2009. Enhanced phytoextraction of  
415 an agricultural cr-and pb-contaminated soil by bioaugmentation with siderophore-  
416 producing bacteria. *Chemosphere*, **74**:280–286.
- 417 Bulgarelli, D., M. Rott, K. Schlaeppli, E. V. L. van Themaat, N. Ahmadinejad, F. Assenza,  
418 P. Rauf, B. Huettel, R. Reinhardt, E. Schmelzer, J. Peplies, F. O. Gloeckner, R. Amann,  
419 T. Eickhorst, and P. Schulze-Lefert. 2012. Revealing structure and assembly cues for  
420 *arabidopsis* root-inhabiting bacterial microbiota. *Nature*, **488**:91–95.

- 421 Burd, G. I., D. G. Dixon, and B. R. Glick. 2000. Plant growth-promoting bacteria that  
422 decrease heavy metal toxicity in plants. *Canadian journal of microbiology*, **46**:237–245.
- 423 Chu, C., N. E. Mandrak, and C. K. Minns. 2005. Potential impacts of climate change on  
424 the distributions of several common and rare freshwater fishes in Canada. *Diversity and*  
425 *Distributions*, **11**:299–310.
- 426 Comte, L., L. Buisson, M. Daufresne, and G. Grenouillet. 2013. Climate-induced changes  
427 in the distribution of freshwater fish: observed and predicted trends. *Freshwater Biology*,  
428 **58**:625–639.
- 429 Desianti, N. 2012. Interactions between duckweeds and their diatom epiphytes. Ph.D.  
430 thesis, University of Oklahoma.
- 431 Dirilgen, N. and Y. Inel. 1994. Effects of zinc and copper on growth and metal accumula-  
432 tion in duckweed, *lemna minor*. *Bulletin of environmental contamination and toxicology*,  
433 **53**:442–449.
- 434 Douglas, A. E. and J. H. Werren. 2016. Holes in the hologenome: why host-microbe  
435 symbioses are not holobionts. *MBio*, **7**:e02099–15.
- 436 Duong, T. P. and J. M. Tiedje. 1985. Nitrogen fixation by naturally occurring duckweed–  
437 cyanobacterial associations. *Canadian journal of microbiology*, **31**:327–330.
- 438 Eckardt, N. A. and D. D. Biesboer. 1988. Ecological aspects of nitrogen fixation (acetylene  
439 reduction) associated with plants of a Minnesota wetland community. *Canadian journal*  
440 *of botany*, **66**:1359–1363.
- 441 Friesen, M. L. 2012. Widespread fitness alignment in the legume–rhizobium symbiosis.  
442 *New Phytologist*, **194**:1096–1111.
- 443 Friesen, M. L., S. S. Porter, S. C. Stark, E. J. von Wettberg, J. L. Sachs, and E. Martinez-  
444 Romero. 2011. Microbially mediated plant functional traits. *Annual Review of Ecology,*  
445 *Evolution, and Systematics*, **42**:23–46.
- 446 Gatidou, G., M. Oursouzidou, A. Stefanatou, and A. S. Stasinakis. 2017. Removal mecha-  
447 nisms of benzotriazoles in duckweed *lemna minor* wastewater treatment systems. *Science*  
448 *of the Total Environment*, **596**:12–17.
- 449 Glick, B. R. 2003. Phytoremediation: synergistic use of plants and bacteria to clean up the  
450 environment. *Biotechnology advances*, **21**:383–393.
- 451 Glooschenko, V., W. Weller, P. Smith, R. Alvo, and J. Archbold. 1992. Amphibian  
452 distribution with respect to pond water chemistry near Sudbury, Ontario. *Canadian*  
453 *Journal of Fisheries and Aquatic Sciences*, **49**:114–121.
- 454 Göbel, P., C. Dierkes, and W. Coldewey. 2007. Storm water runoff concentration matrix  
455 for urban areas. *Journal of contaminant hydrology*, **91**:26–42.

- 456 Goh, C.-H., D. F. V. Vallejos, A. B. Nicotra, and U. Mathesius. 2013. The impact of  
457 beneficial plant-associated microbes on plant phenotypic plasticity. *Journal of Chemical*  
458 *Ecology*, **39**:826–839.
- 459 Gomes, M. P., C. A. Gonçalves, J. C. M. de Brito, A. M. Souza, F. V. da Silva Cruz,  
460 E. M. Bicalho, C. C. Figueredo, and Q. S. Garcia. 2017. Ciprofloxacin induces oxidative  
461 stress in duckweed (*lemna minor* l.): Implications for energy metabolism and antibiotic-  
462 uptake ability. *Journal of hazardous materials*, **328**:140–149.
- 463 Hadfield, J. D. 2010. MCMC methods for multi-response generalized linear mixed models:  
464 the MCMCglmm R package. *Journal of Statistical Software*, **33**:1–22. Version 2.22.1.
- 465 Heijerick, D. G., K. A. De Schamphelaere, and C. R. Janssen. 2002. Predicting acute  
466 zinc toxicity for daphnia magna as a function of key water chemistry characteristics:  
467 development and validation of a biotic ligand model. *Environmental Toxicology and*  
468 *Chemistry*, **21**:1309–1315.
- 469 Herb, W. R., O. Mohseni, and H. G. Stefan. 2009. Simulation of temperature mitigation  
470 by a stormwater detention pond 1. *JAWRA Journal of the American Water Resources*  
471 *Association*, **45**:1164–1178.
- 472 Ho, K. H. E. 2017. The effects of asexuality and selfing on genetic diversity, the efficacy of  
473 selection and species persistence. Ph.D. thesis, University of Toronto St. George.
- 474 Ishizawa, H., M. Kuroda, and M. Ike. 2017*a*. Draft genome sequence of *aquitalea mag-*  
475 *nusonii* strain h3, a plant growth-promoting bacterium of duckweed (*lemna minor*).  
476 *Genome announcements*, **5**:e00812–17.
- 477 Ishizawa, H., M. Kuroda, M. Morikawa, and M. Ike. 2017*b*. Evaluation of environmen-  
478 tal bacterial communities as a factor affecting the growth of duckweed *lemna minor*.  
479 *Biotechnology for biofuels*, **10**:62.
- 480 Jayasri, M. and K. Suthindhiran. 2017. Effect of zinc and lead on the physiological and  
481 biochemical properties of aquatic plant *lemna minor*: its potential role in phytoremedia-  
482 tion. *Applied Water Science*, **7**:1247–1253.
- 483 Johnson, N. C., G. W. T. Wilson, M. A. Bowker, J. A. Wilson, and R. M. Miller. 2010.  
484 Resource limitation is a driver of local adaptation in mycorrhizal symbioses. *Proceedings*  
485 *of the National Academy of Sciences*, **107**:2093–2098.
- 486 Keenan, T., B. Darby, E. Felts, O. Sonnentag, M. Friedl, K. Hufkens, J. O’Keefe,  
487 S. Klosterman, J. W. Munger, M. Toomey, et al. 2014. Tracking forest phenology and  
488 seasonal physiology using digital repeat photography: a critical assessment. *Ecological*  
489 *Applications*, **24**:1478–1489.
- 490 Kiers, E. T., R. A. Rousseau, S. A. West, and R. F. Denison. 2003. Host sanctions and the  
491 legume–rhizobium mutualism. *Nature*, **425**:78–81.

- 492 Klironomos, J. N. 2002. Feedback with soil biota contributes to plant rarity and invasive-  
493 ness in communities. *Nature*, **417**:67–70.
- 494 Krazčič, B., M. Slekovec-Golob, and J. Nemeč. 1995. Promotion of flowering by *mn-eddha*  
495 in the photoperiodically neutral plant *Spirodela polyrrhiza* (L.) Schleiden. *Journal of*  
496 *plant physiology*, **147**:397–400.
- 497 Lau, J. A. and J. T. Lennon. 2012. Rapid responses of soil microorganisms improve  
498 plant fitness in novel environments. *Proceedings of the National Academy of Sciences*,  
499 **109**:14058–14062.
- 500 Liskco, Z. and J. Struger. 1996. Trace metals contamination of urban streams and  
501 stormwater detention ponds. In W. James, editor, *Advances in modeling the manage-*  
502 *ment of stormwater impacts*, chapter 17, pages 269–278. CRC Press.
- 503 Lundberg, D. S., S. L. Lebeis, S. H. Paredes, S. Yourstone, J. Gehring, S. Malfatti,  
504 J. Tremblay, A. Engelbrektson, V. Kunin, T. G. del Rio, R. C. Edgar, T. Eickhorst,  
505 R. E. Ley, P. Hugenholtz, S. G. Tringe, and J. L. Dangl. 2012. Defining the core  
506 *Arabidopsis thaliana* root microbiome. *Nature*, **488**:86–90.
- 507 Madhaiyan, M., S. Poonguzhali, and T. Sa. 2007. Metal tolerating methylotrophic bacteria  
508 reduces nickel and cadmium toxicity and promotes plant growth of tomato (*Lycopersicon*  
509 *esculentum* L.). *Chemosphere*, **69**:220–228.
- 510 Miller, P., K. Munkittrick, and D. Dixon. 1992. Relationship between concentrations of  
511 copper and zinc in water, sediment, benthic invertebrates, and tissues of white sucker  
512 (*Catostomus commersoni*) at metal-contaminated sites. *Canadian Journal of Fisheries*  
513 *and Aquatic Sciences*, **49**:978–984.
- 514 Mkandawire, M. and E. G. Dudel. 2007. Are *Lemna* spp. effective phytoremediation agents.  
515 *Bioremediation, Biodiversity and Bioavailability*, **1**:56–71.
- 516 Mo, S., D. Choi, and J. Robinson. 1989. Uptake of mercury from aqueous solution by  
517 duckweed: the effects of pH, copper and humic acid. *Journal of Environmental Science &*  
518 *Health Part A*, **24**:135–146.
- 519 Mueller, U. G. and J. L. Sachs. 2015. Engineering microbiomes to improve plant and  
520 animal health. *Trends in microbiology*, **23**:606–617.
- 521 O'Brien, M. J., F. I. Pugnaire, S. Rodríguez-Echeverría, J. A. Morillo, F. Martín-Usero,  
522 A. López-Escoriza, D. J. Aránega, and C. Armas. 2018. Mimicking a rainfall gradient to  
523 test the role of soil microbiota for mediating plant responses to drier conditions. *Oikos*.
- 524 Ontario Ministry of the Environment. 2011. Technical memorandum: an analysis of  
525 nutrients and select metals within wastewater (pond discharges). Technical report,  
526 Southwestern Regional Office.



- 527 Panke-Buisse, K., A. C. Poole, J. K. Goodrich, R. E. Ley, and J. Kao-Kniffin. 2015.  
528 Selection on soil microbiomes reveals reproducible impacts on plant function. *The ISME*  
529 *journal*, **9**:980–989.
- 530 Polz, M. F., E. J. Alm, and W. P. Hanage. 2013. Horizontal gene transfer and the evolu-  
531 tion of bacterial and archaeal population structure. *Trends in Genetics*, **29**:170–175.
- 532 Prati, D. and B. Schmid. 2000. Genetic differentiation of life-history traits within popula-  
533 tions of the clonal plant *Ranunculus reptans*. *Oikos*, **90**:442–456.
- 534 R Core Team. 2014. *R: A Language and Environment for Statistical Computing*. R  
535 Foundation for Statistical Computing, Vienna, Austria. Version 3.1.1.
- 536 Radić, S., M. Babić, D. Škobić, V. Roje, and B. Pevalek-Kozlina. 2010. Ecotoxicological ef-  
537 fects of aluminum and zinc on growth and antioxidants in *lemna minor* l. *Ecotoxicology*  
538 *and environmental safety*, **73**:336–342.
- 539 Rajkumar, M., S. Sandhya, M. Prasad, and H. Freitas. 2012. Perspectives of plant-  
540 associated microbes in heavy metal phytoremediation. *Biotechnology advances*, **30**:1562–  
541 1574.
- 542 Rúa, M. A., A. Antoninka, P. M. Antunes, V. B. Chaudhary, C. Gehring, L. J. Lamit, and  
543 *et al.* 2016. Home-field advantage? evidence of local adaptation among plants, soil, and  
544 arbuscular mycorrhizal fungi through meta-analysis. *BMC Evol Biol*, **16**.
- 545 Sachs, J. L., U. G. Mueller, T. P. Wilcox, and J. J. Bull. 2004. The evolution of coopera-  
546 tion. *The Quarterly Review of Biology*, **79**:135–160.
- 547 Sasmaz, M., E. I. A. Topal, E. Obek, and A. Sasmaz. 2015. The potential of *lemna gibba*  
548 l. and *lemna minor* l. to remove cu, pb, zn, and as in gallery water in a mining area in  
549 keban, turkey. *Journal of environmental management*, **163**:246–253.
- 550 Schneider, C. A., W. S. Rasband, and K. W. Eliceiri. 2012. Nih image to imagej: 25 years  
551 of image analysis. *Nature methods*, **9**:671–675.
- 552 Sekomo, C. B., D. P. Rousseau, S. A. Saleh, and P. N. Lens. 2012. Heavy metal removal  
553 in duckweed and algae ponds as a polishing step for textile wastewater treatment.  
554 *Ecological engineering*, **44**:102–110.
- 555 Shantz, A. A., N. P. Lemoine, and D. E. Burkepile. 2016. Nutrient loading alters the  
556 performance of key nutrient exchange mutualisms. *Ecology Letters*, **19**:20–28.
- 557 Simonsen, A. K. and J. R. Stinchcombe. 2014. Standing genetic variation in host prefer-  
558 ence for mutualist microbial symbionts. In *Proc. R. Soc. B*, volume 281, page 20142036.  
559 The Royal Society.
- 560 Smith, S. E. and D. J. Read. 2008. *Mycorrhizal symbiosis*. Academic press, London, 3rd  
561 edition.

- 562 Sobariu, D. L., D. I. T. Fertu, M. Diaconu, L. V. Pavel, R.-M. Hlihor, E. N. Drăgoi,  
563 S. Curteanu, M. Lenz, P. F.-X. Corvini, and M. Gavrilescu. 2017. Rhizobacteria and  
564 plant symbiosis in heavy metal uptake and its implications for soil bioremediation. *New*  
565 *biotechnology*, **39**:125–134.
- 566 Spiegelhalter, D. J., N. G. Best, B. P. Carlin, and A. Van Der Linde. 2002. Bayesian  
567 measures of model complexity and fit. *Journal of the Royal Statistical Society: Series*  
568 *B (Statistical Methodology)*, **64**:583–639.
- 569 Sree, K. S., K. Adelman, C. Garcia, E. Lam, and K.-J. Appenroth. 2015. Natural  
570 variance in salt tolerance and induction of starch accumulation in duckweeds. *Planta*,  
571 **241**:1395–1404.
- 572 Stout, L. and K. Nüsslein. 2010. Biotechnological potential of aquatic plant–microbe  
573 interactions. *Current opinion in biotechnology*, **21**:339–345.
- 574 Stout, L. M., E. N. Dodova, J. F. Tyson, and K. Nüsslein. 2010. Phytoprotective influence  
575 of bacteria on growth and cadmium accumulation in the aquatic plant *lemna minor*.  
576 *Water research*, **44**:4970–4979.
- 577 Thompson, J. N. 2005. *The geographic mosaic of coevolution*. University of Chicago Press,  
578 Chicago.
- 579 Toyama, T., K. Sei, N. Yu, H. Kumada, D. Inoue, H. Hoang, S. Soda, Y.-C. Chang,  
580 S. Kikuchi, M. Fujita, et al. 2009. Enrichment of bacteria possessing catechol dioxy-  
581 genase genes in the rhizosphere of *spirodela polyrrhiza*: a mechanism of accelerated  
582 biodegradation of phenol. *Water research*, **43**:3765–3776.
- 583 Underwood, G. and J. Baker. 1991. The effect of various aquatic bacteria on the growth  
584 and senescence of duckweed (*lemna minor*). *Journal of applied bacteriology*, **70**:192–196.
- 585 Uysal, Y. 2013. Removal of chromium ions from wastewater by duckweed, *lemna minor* l.  
586 by using a pilot system with continuous flow. *Journal of hazardous materials*, **263**:486–  
587 492.
- 588 Van Steveninck, R., M. Van Steveninck, A. Wells, and D. Fernando. 1990. Zinc tolerance  
589 and the binding of zinc as zinc phytate in *lemna minor*. x-ray microanalytical evidence.  
590 *Journal of plant physiology*, **137**:140–146.
- 591 Wagner, M. R., D. S. Lundberg, D. Coleman-Derr, S. G. Tringe, J. L. Dangl, and  
592 T. Mitchell-Olds. 2014. Natural soil microbes alter flowering phenology and the intensity  
593 of selection on flowering time in a wild *arabidopsis* relative. *Ecology Letters*, **17**:717–  
594 726.
- 595 Weese, D. J., K. D. Heath, B. Dentinger, and J. A. Lau. 2015. Long-term nitrogen  
596 addition causes the evolution of less-cooperative mutualists. *Evolution*, **69**:631–642.

- 597 Zhao, Y., Y. Fang, Y. Jin, J. Huang, S. Bao, T. Fu, Z. He, F. Wang, M. Wang, and  
598 H. Zhao. 2014*a*. Pilot-scale comparison of four duckweed strains from different genera  
599 for potential application in nutrient recovery from wastewater and valuable biomass  
600 production. *Plant Biology*, **17**:82–90.
- 601 Zhao, Y., Y. Fang, Y. Jin, J. Huang, S. Bao, T. Fu, Z. He, F. Wang, and H. Zhao. 2014*b*.  
602 Potential of duckweed in the conversion of wastewater nutrients to valuable biomass: A  
603 pilot-scale comparison with water hyacinth. *Bioresource technology*, **163**:82–91.
- 604 Zhao, Y., Y. Fang, Y. Jin, J. Huang, X. Ma, K. He, Z. He, F. Wang, and H. Zhao. 2015.  
605 Microbial community and removal of nitrogen via the addition of a carrier in a pilot-  
606 scale duckweed-based wastewater treatment system. *Bioresource technology*, **179**:549–  
607 558.
- 608 Zhu, X.-C., F.-B. Song, and H.-W. Xu. 2009. Arbuscular mycorrhizae improves low  
609 temperature stress in maize via alterations in host water status and photosynthesis.  
610 *Plant Soil*, **331**:129–137.
- 611 Ziegler, P., K. Adelman, S. Zimmer, C. Schmidt, and K.-J. Appenroth. 2015. Relative in  
612 vitro growth rates of duckweeds (Lemnaceae) the most rapidly growing higher plants.  
613 *Plant Biology*, **17**:33–41.
- 614 Ziegler, P., K. Sree, and K.-J. Appenroth. 2016. Duckweeds for water remediation and  
615 toxicity testing. *Toxicological & Environmental Chemistry*, **98**:1127–1154.
- 616 Zuberer, D. 1982. Nitrogen fixation (acetylene reduction) associated with duckweed  
617 (Lemnaceae) mats. *Applied and environmental microbiology*, **43**:823–828.

## 1 Supporting Information

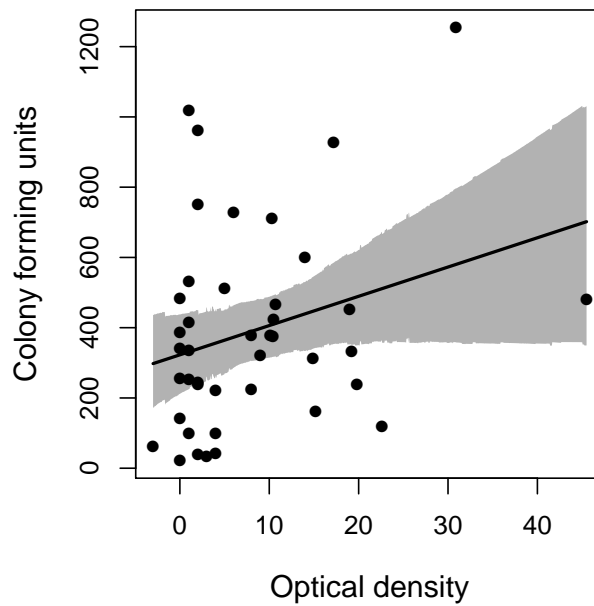

Figure S1: Correlation between microbial community fitness measures. Points are a subset of experimental wells for which both colony forming units and optical density were measured. The linear relationship in the background is the model predictions for the mean with 95% highest posterior density intervals.
